# Supplementary material for: Mg2+ ion as a tuner for colorimetric sensing of glyphosate with improved sensitivity via the aggregation of 2-mercapto-5-nitrobenzimidazole capped silver nanoparticles
Source: Royal Society of Chemistry journal article supplement (doi:10.1039/c6ra06450g), 2016-01-01
Supplement: c6ra06450g1.pdf [file c6ra06450g1.pdf]

**Mg<sup>2+</sup> ion as a tuner for colorimetric sensing of glyphosate with improved sensitivity *via* the aggregation of 2-mercapto-5-nitrobenzimidazole capped silver nanoparticles**

**Karuna A. Rawat<sup>a</sup>, Rutuben P. Majithiya<sup>a</sup>, Jigneshkumar V. Rohit<sup>a</sup>, Hirakendu Basu<sup>b</sup>, Rakesh Kumar Singhal<sup>b</sup>, and Suresh Kumar Kailasa<sup>a\*</sup>**

<sup>a</sup>*Department of Applied Chemistry, S. V. National Institute of Technology, Surat-395 007, India*

<sup>b</sup>*Analytical Chemistry Division, Bhabha Atomic Research Center, Trombay, Mumbai 400085, India*

<sup>\*</sup>*Corresponding author, Phone: +91-261-2201730; Fax: +91-261-2227334*

*E-mail: sureshkumarchem@gmail.com; skk@ashd.svnit.ac.in*

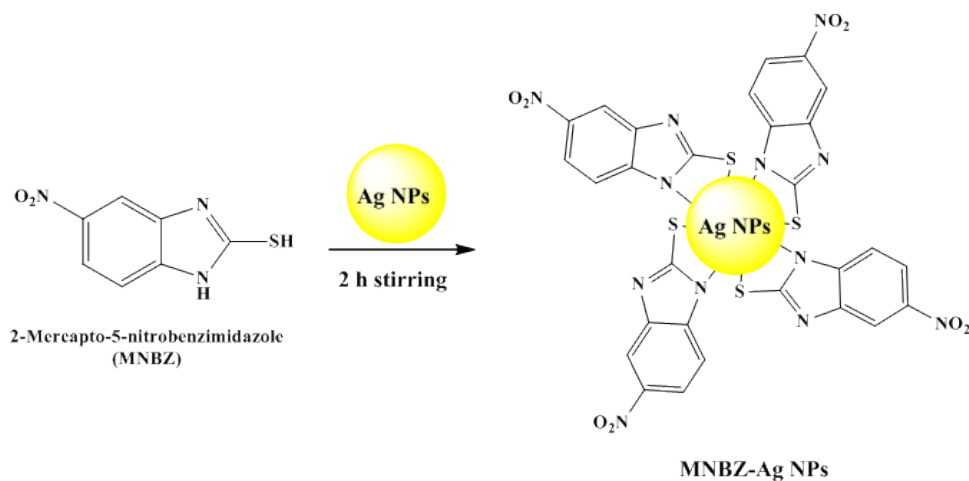

**Figure S1.** Schematic representation for preparation of MNBZ-Ag NPs.

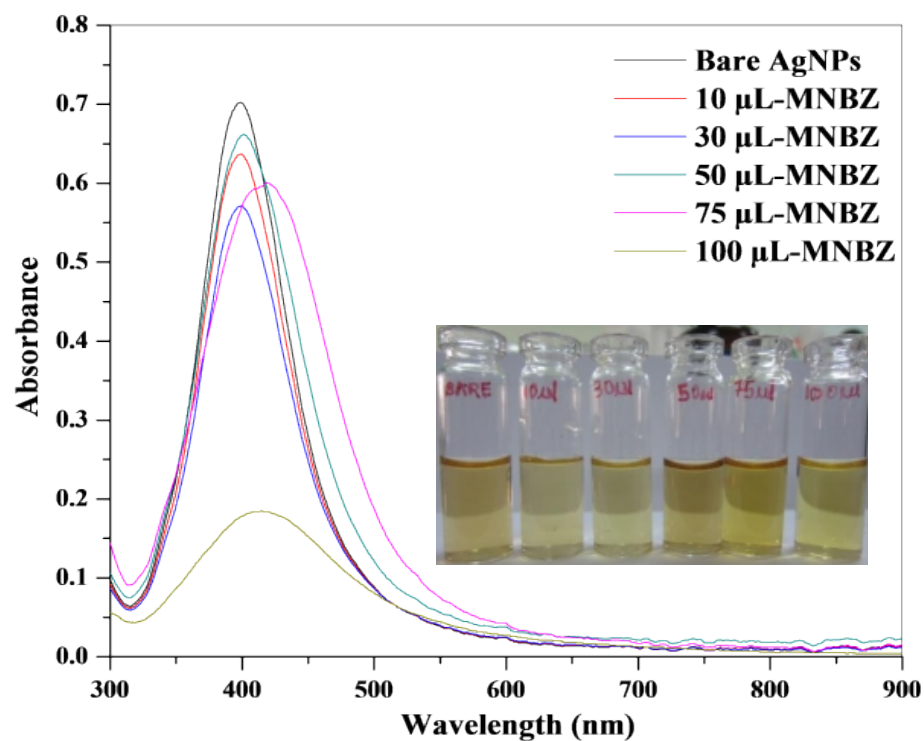

**Figure S2.** UV-visible absorption spectra of Ag NPs at different volumes of MNBZ (10 – 100  $\mu\text{L}$ ).

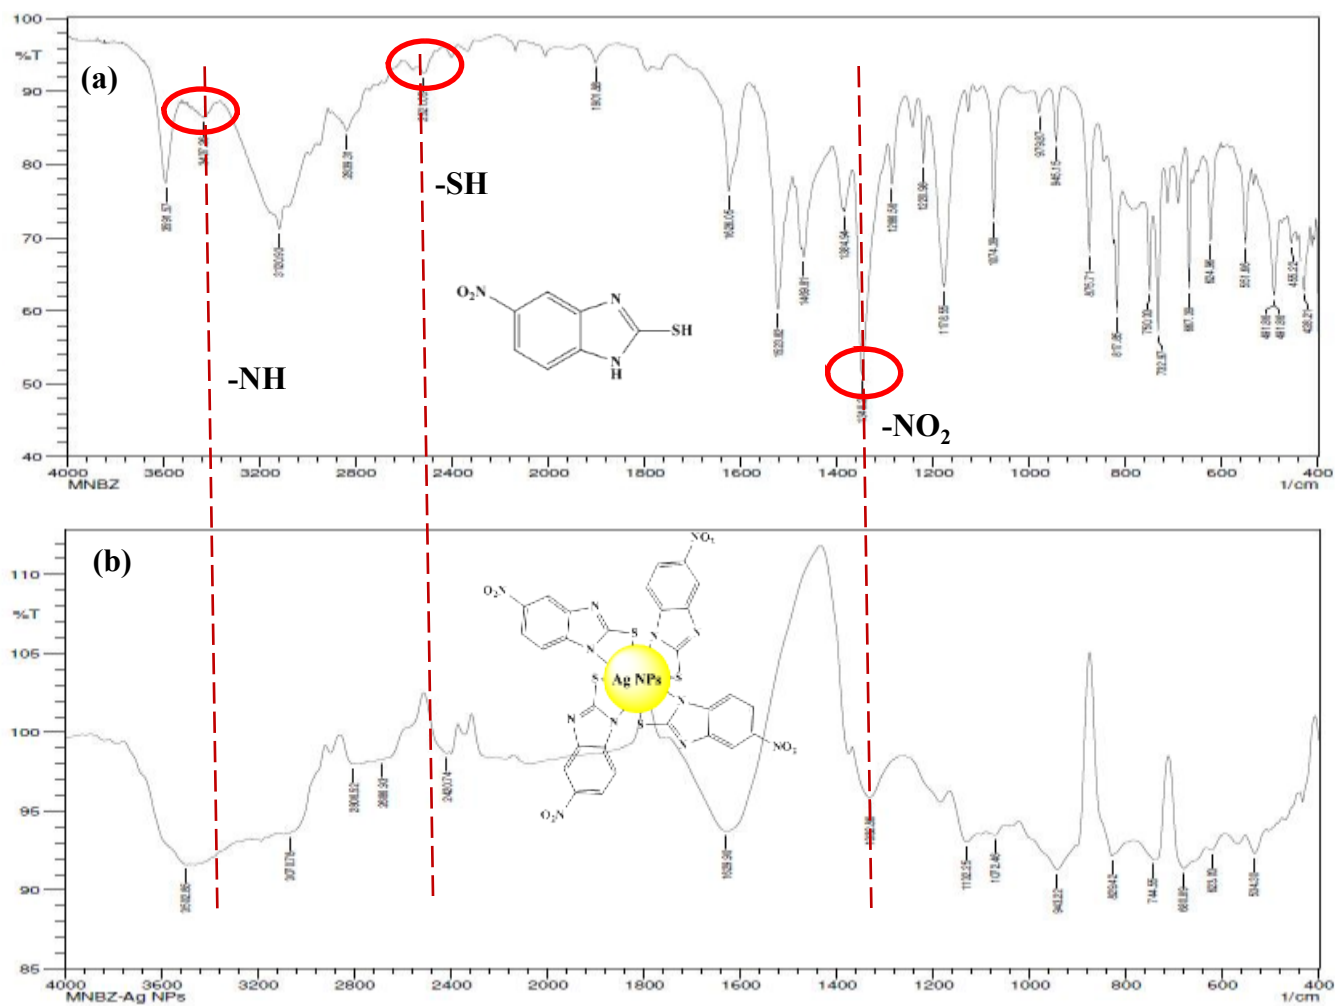

**Figure S3.** FT-IR spectra of (a) pure MNBZ and (b) MNBZ-Ag NPs.

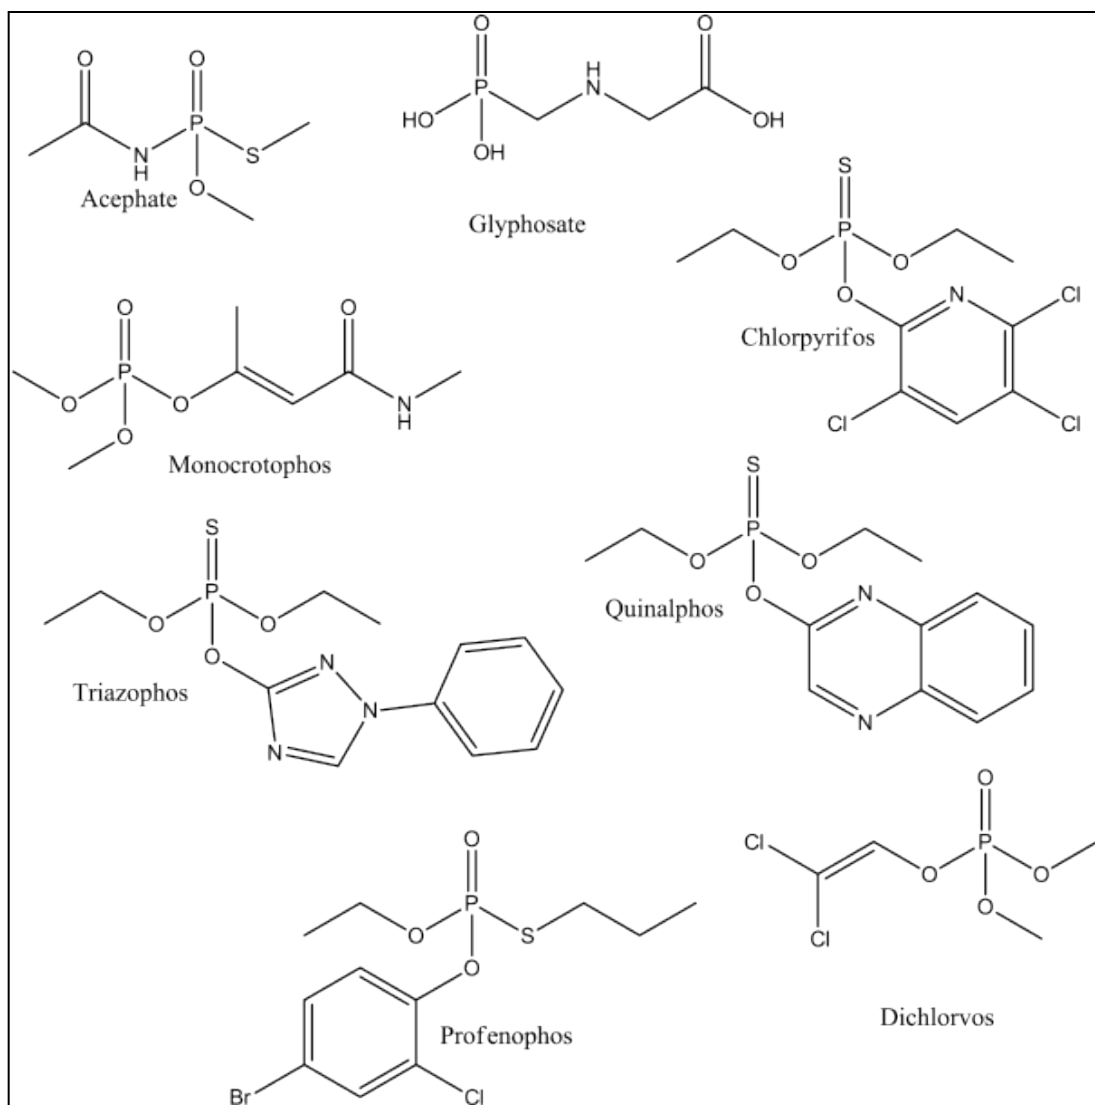

**Figure S4.** Structures of organophosphorus pesticides which are used for selectivity study using MNBZ-Ag NPs as colorimetric probe.

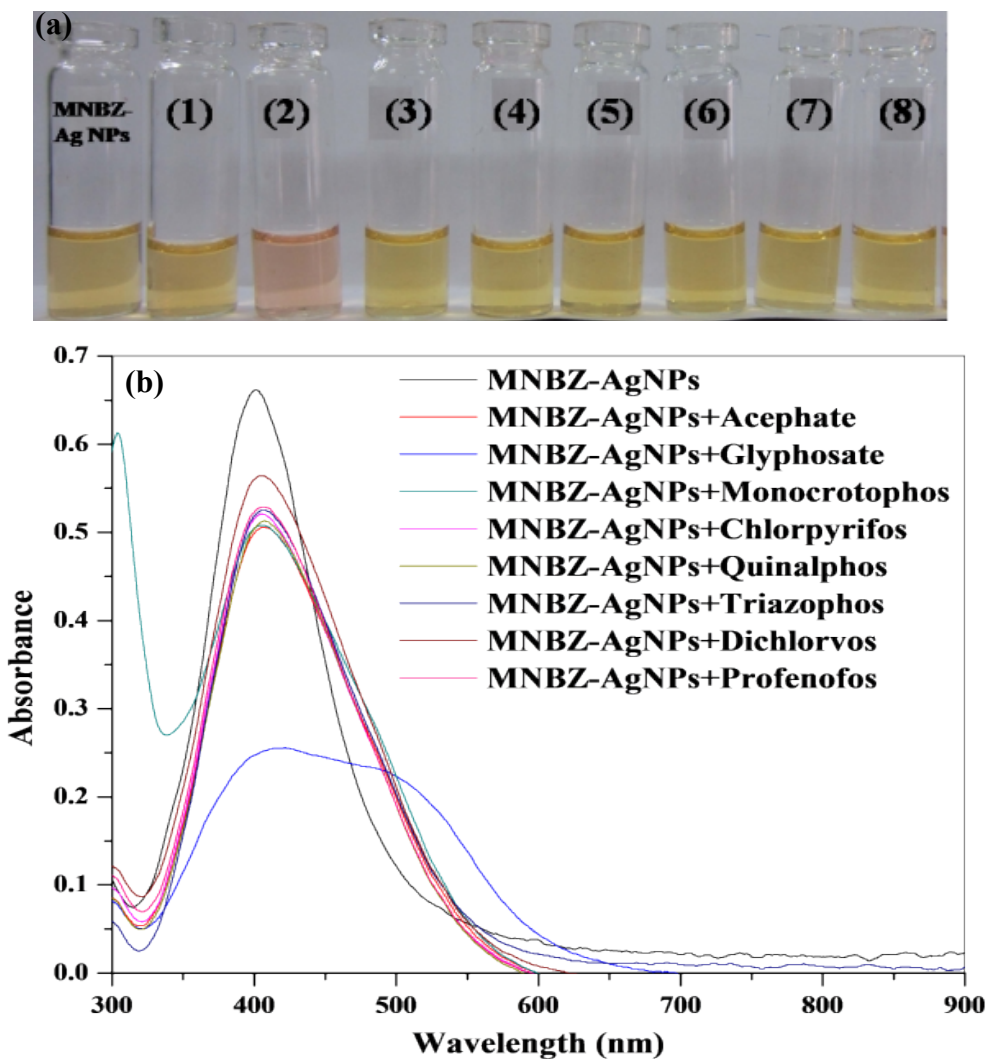

**Figure S5.** (a) Photographic image and (b) UV-visible spectra of MNBZ-Ag NPs in presence of organophosphorus pesticides (1: acephate, 2: glyphosate, 3: monocrotophos, 4: chlorpyrifos, 5: quinalphos, 6: triazophos, 7: dichlorvos, 8: profenofos)

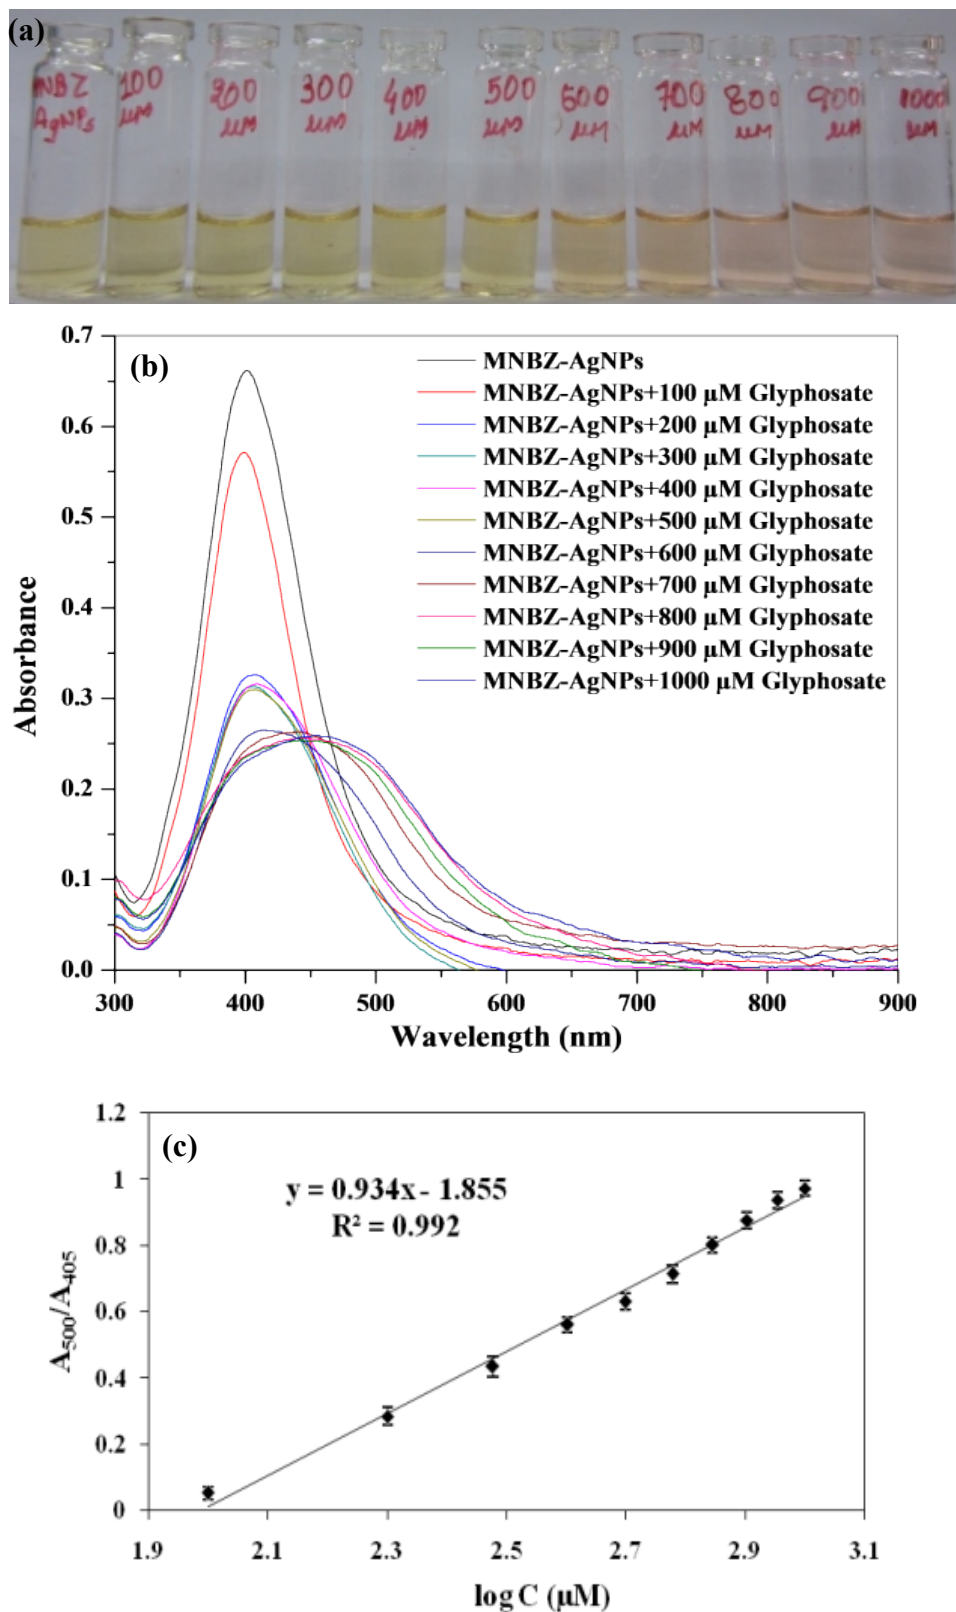

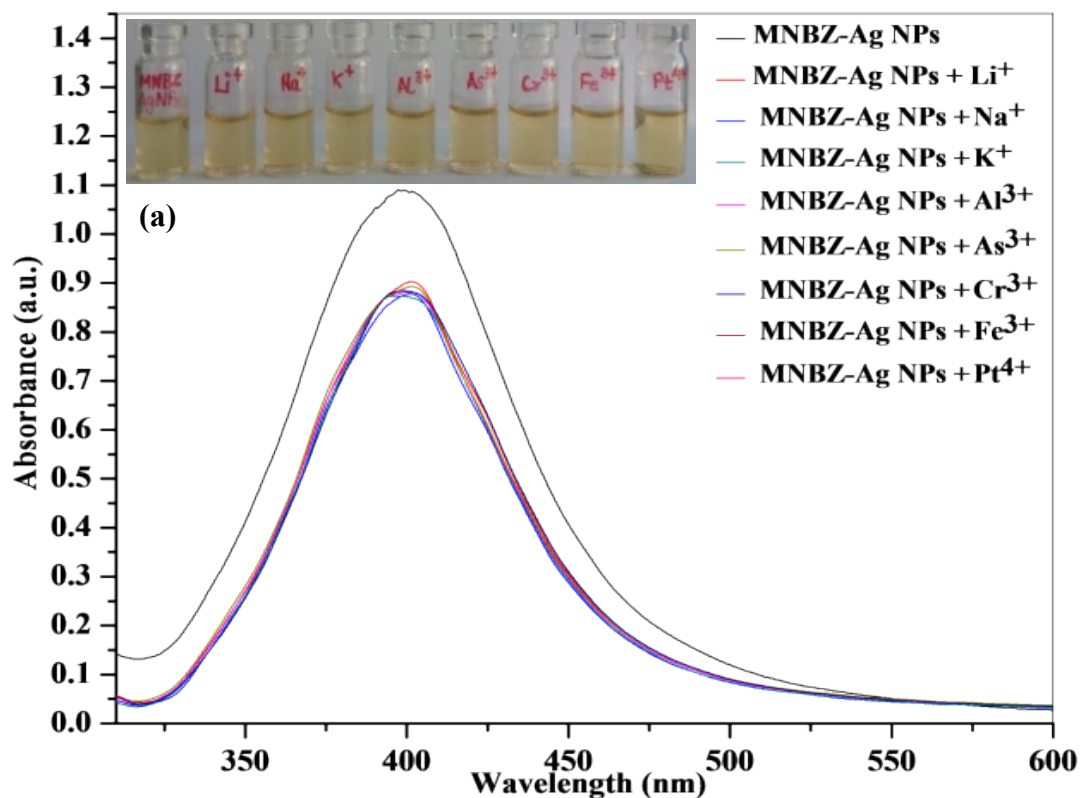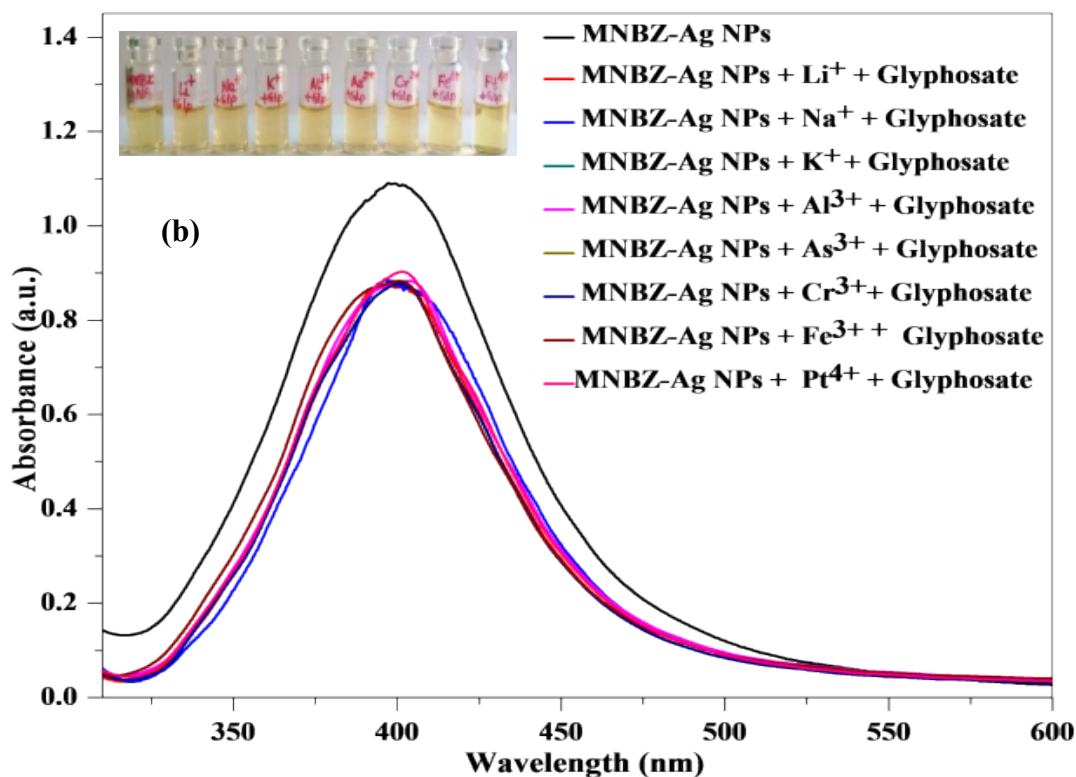

**Figure S7.** (a) UV-visible absorption spectra of MNBZ-Ag NPs in the presence of various metal ions (monovalent metal ions -  $\text{Li}^+$ ,  $\text{Na}^+$ ,  $\text{K}^+$ , trivalent metal ions -  $\text{Al}^{3+}$ ,  $\text{As}^{3+}$ ,  $\text{Cr}^{3+}$ ,  $\text{Fe}^{3+}$  and tetravalent metal ion -  $\text{Pt}^{4+}$ , 50  $\mu\text{M}$ ) without addition of glyphosate. (b) UV-visible absorption spectra of MNBZ-Ag NPs in the presence of glyphosate (10  $\mu\text{M}$ ) using various metal ions (monovalent metal ions -  $\text{Li}^+$ ,  $\text{Na}^+$ ,  $\text{K}^+$ , trivalent metal ions -  $\text{Al}^{3+}$ ,  $\text{As}^{3+}$ ,  $\text{Cr}^{3+}$ ,  $\text{Fe}^{3+}$  and tetravalent metal ion -  $\text{Pt}^{4+}$ , 50  $\mu\text{M}$ ) as tuners. Inset is the photographic images illustrating the corresponding colorimetric response.

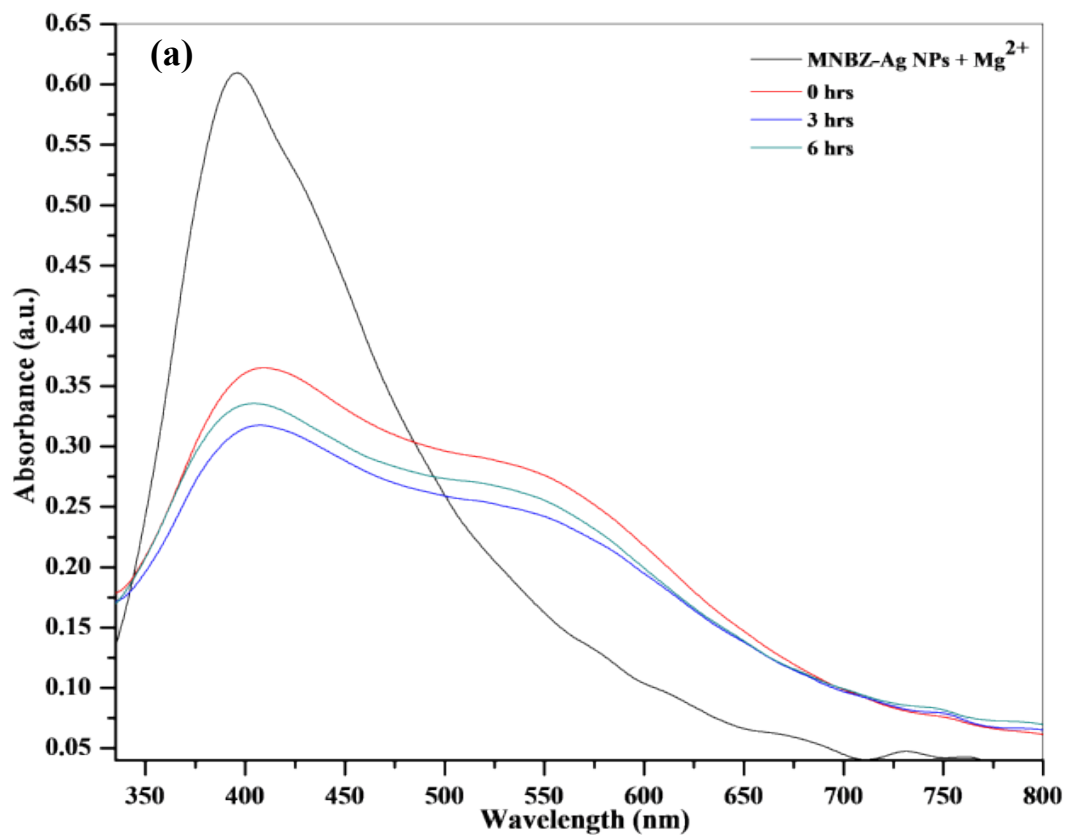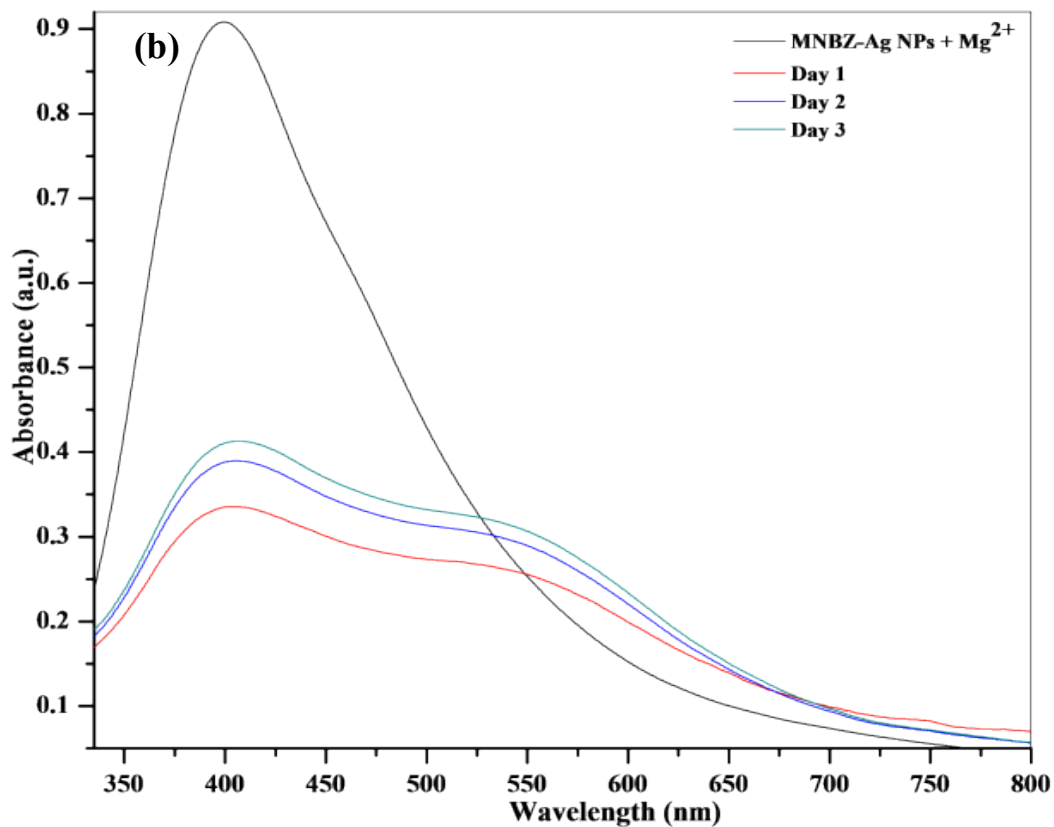

**Figure S8.** UV-visible absorption spectra of MNBZ-Ag NPs in the presence of glyphosate (1000 nM) using  $Mg^{2+}$  ion as a tuner at (a) inter (for corn) and (b) intra -day (for potato).

**Table S1.** Extraction efficiency of glyphosate and its recovery ranges from potato and corn using water, MeOH and EtOH as extracting solvents at inter- and intra- day using MNBZ-Ag NPs as a probe and Mg<sup>2+</sup> ion as a tuner.

| Analyte | Solvent | Added<br>(nM) | Intra-day               |                       |                        |                       | Inter-day               |                       |                        |                       |
|---------|---------|---------------|-------------------------|-----------------------|------------------------|-----------------------|-------------------------|-----------------------|------------------------|-----------------------|
|         |         |               | Found (nM) <sup>a</sup> | Recovery <sup>b</sup> | Precision <sup>c</sup> | Accuracy <sup>d</sup> | Found (nM) <sup>a</sup> | Recovery <sup>b</sup> | Precision <sup>c</sup> | Accuracy <sup>d</sup> |
| Potato  | Water   | 500           | 503±0.41                | 100.6                 | 0.8                    | +0.6                  | 501±0.01                | 100.3                 | 1.8                    | + 0.3                 |
|         |         | 750           | 739±0.49                | 98.6                  | 1.5                    | -1.4                  | 753±0.01                | 99.7                  | 1.3                    | +0.4                  |
|         |         | 1000          | 999±0.01                | 99.9                  | 1.3                    | -0.11                 | 985±0.91                | 98.5                  | 1.8                    | -0.4                  |
| Corn    | Water   | 500           | 518±0.44                | 103.7                 | 1.3                    | +3.6                  | 500±0.10                | 99.9                  | 1.9                    | +1.1                  |
|         |         | 750           | 749±0.99                | 99.9                  | 1.9                    | -0.1                  | 745±0.11                | 99.4                  | 2.2                    | -0.6                  |
|         |         | 1000          | 981±0.11                | 98.1                  | 1.3                    | -1.9                  | 1001±0.67               | 100.1                 | 0.8                    | +0.1                  |
| Potato  | MeOH    | 500           | 498±0.61                | 99.6                  | 1.2                    | +0.2                  | 501±0.83                | 100.2                 | 1.7                    | + 0.3                 |
|         |         | 750           | 750±0.42                | 100.0                 | 1.2                    | +0.4                  | 742±0.21                | 98.9                  | 1.8                    | +0.3                  |
|         |         | 1000          | 1004±0.55               | 100.4                 | 0.8                    | +0.9                  | 998±0.61                | 99.8                  | 1.8                    | -0.4                  |
| Corn    | MeOH    | 500           | 499±0.73                | 99.8                  | 1.0                    | -0.1                  | 508±0.24                | 101.6                 | 0.5                    | +1.1                  |
|         |         | 750           | 752±0.21                | 100.2                 | 0.4                    | +0.3                  | 749±0.05                | 99.9                  | 0.1                    | -0.1                  |
|         |         | 1000          | 1008±0.90               | 100.8                 | 0.9                    | +0.8                  | 997±0.89                | 99.7                  | 1.5                    | -0.3                  |
| Potato  | EtOH    | 500           | 421±0.31                | 84.8                  | 1.1                    | -15.7                 | 436±0.77                | 85.9                  | 2.9                    | -12.7                 |
|         |         | 750           | 671±0.12                | 89.5                  | 2.7                    | -10.5                 | 695±0.31                | 92.7                  | 2.8                    | -10.5                 |
|         |         | 1000          | 895±0.11                | 89.5                  | 0.8                    | +10.5                 | 889± 0.52               | 88.9                  | 0.7                    | -11.1                 |
| Corn in | EtOH    | 500           | 394±0.77                | 76.9                  | 2.9                    | -21.1                 | 374±0.24                | 73.2                  | 0.8                    | -25.1                 |
|         |         | 750           | 535±0.10                | 71.3                  | 2.8                    | -28.7                 | 576±0.39                | 76.8                  | 1.1                    | -23.1                 |
|         |         | 1000          | 725±0.21                | 72.5                  | 1.3                    | -27.6                 | 774±0.86                | 77.5                  | 1.3                    | -22.5                 |

<sup>a</sup>Mean±standard deviation (n = 3). <sup>b</sup>% Recovery = (Found concentration/known concentration)×100,

<sup>c</sup> Precision was calculated (RSD, %) from standard deviation/mean×100, <sup>d</sup>Accuracy was calculated from (found concentration–known concentration)/known concentration×100.
